# Supplementary material for: ‘Your Tube’: the role of different diets in children who are gastrostomy fed: protocol for a mixed methods exploratory sequential study
Source: PubMed Central journal article supplement (PMC6797291; doi:10.1136/bmjopen-2019-033831), 2019-10-09
Supplement: bmjopen-2019-033831.reviewer_comments.pdf [file bmjopen-2019-033831.reviewer_comments.pdf]

## PEER REVIEW HISTORY

BMJ Open publishes all reviews undertaken for accepted manuscripts. Reviewers are asked to complete a checklist review form (<http://bmjopen.bmj.com/site/about/resources/checklist.pdf>) and are provided with free text boxes to elaborate on their assessment. These free text comments are reproduced below.

## ARTICLE DETAILS

|                            |                                                                                                                                                                                  |
|----------------------------|----------------------------------------------------------------------------------------------------------------------------------------------------------------------------------|
| <b>TITLE (PROVISIONAL)</b> | 'YourTube' The Role of Different Diets in Children who are Gastrostomy Fed; protocol for a mixed methods exploratory sequential study                                            |
| <b>AUTHORS</b>             | Taylor, Johanna; O'Neill, Mark; Maddison, Jane; Richardson, Gerry; Hewitt, Catherine; Horridge, Karen; Cade, Janet; McCarter, Alison; Beresford, Bryony; Fraser, Lorna Katharine |

This article was not externally reviewed at BMJ Open. Protocols that have been independently assessed prior to submission to BMJ Open are usually fast-tracked to publication on the grounds that further substantial changes will not be possible. This independent assessment will usually be external, independent review for both a substantial grant award from a non-commercial or government funder and ethics approval.
